# Supplementary material
Source: PubMed Central journal article supplement (PMC3268282)
Supplement: 1109034109_sapp.pdf [file 1109034109_sapp.pdf]

1 **Supplemental Information**

**Supporting Information Corrected February 16, 2012**

2 **Data**

3 Forest cover in the year 2000 was estimated by applying a 50% threshold to the Percent Tree Cover Layer  
4 of the 500 m Moderate Resolution Imaging Spectroradiometer (MODIS)-based Vegetation Continuous  
5 Fields (VCF) product for the year 2000 (Hansen et al, 2003). The 50% threshold was selected to  
6 distinguish mature forest from agricultural fallows using high-resolution, Landsat-based forest cover  
7 maps for parts of Indonesia. This threshold has been applied by similar analyses in other tropical regions  
8 (Leimgruber et al 2005; Harper et al 2007; Killeen et al 2007).

9 Our dependent variable, percent deforestation for the period 2000-2005, was derived by rescaling rates of  
10 deforestation from data on the distribution of deforestation (tree cover loss estimates from the 463 m  
11 MODIS VCF product; Hansen et al. 2008) upward by a factor of 2.147 to match data on the total rate of  
12 deforestation (derived from analysis of a stratified, random sample of 77 18.5km x 18.5km blocks of 28.5  
13 m resolution Landsat images; Hansen et al 2008; Hansen et al 2009). An alternative data set on forest  
14 cover loss (Miettenen, 2011) was explored in a sensitivity analysis (Table SI9).

15 Our primary explanatory variable, net present potential gross agricultural revenue, was obtained from  
16 Naidoo and Iwamura (2007). In this 5' data set the annual potential gross agricultural revenue in 2000  
17 US\$ was calculated by multiplying the annual yield of the highest-return agricultural commodity in every  
18 global agro-ecological zone (Fischer *et al*, 2000) by the average market price for that agricultural  
19 commodity from 1995-2005 (<http://faostat.fao.org>). Net present value was obtained by summing annual  
20 revenue over 30 years and applying a discount rate of 10%, following a different application of the same  
21 data set in the Stern Review (Grieg-Gran, 2006).

22 Because the data on potential agricultural revenue was constructed using coarse global information, we  
23 examined in detail the robustness of the relationship between the revenue data and deforestation (Table  
24 SI10). A first-order comparison of increasing increments of \$100/ha/yr potential agricultural revenue and  
25 five alternative indicators of long-term and short-term deforestation (Hansen 2006; Hansen 2008; Hansen  
26 2009; Miettenen 2011; Miettenen 2012) shows that the extent of remaining forest cover is nearly  
27 monotonically decreasing in potential revenue; the short-term deforestation rate and extent of palm  
28 plantation are both nearly monotonically increasing in potential revenue for all but the highest increments  
29 of revenue.

30 Control variables included average slope and elevation (Jarvis et al, 2008), Euclidean distance from  
31 nearest national or regional roads and from provincial capitals (NGA, 2000), boundaries for 33 provinces  
32 and 440 districts from the year 2003, national parks and other protected areas from the year 2006, and  
33 logging concessions (HPH), timber concessions (HTI) and estate crop concessions (*kebun*) from the year  
34 2005 (Minnemeyer et al, 2009). Spatial overlap between protected areas and concessions was negligible,  
35 with fewer than 1% of cells containing both designations.

36 Emissions from deforestation were calculated based on the release of 100% of above- and below-ground  
37 forest biomass carbon (Gibbs and Brown, 2007) plus 10% of soil carbon content in the top 30cm of non-  
38 peat soil (FAO 2008). On peat soils, soil emissions were estimated based on the average 30-year non-  
39 discounted emissions for the agricultural land type (large croplands; small-scale agriculture; shrublands)

40 to which such forest are converted, weighted by the area of each of these land types in historical  
41 conversion across Indonesia (Hoojier, 2010). The resulting estimate of national average soil carbon  
42 emissions following deforestation on peatlands was 1474 tCO<sub>2</sub>e/ha, which compares to a tropical average  
43 of 1,486±183 tCO<sub>2</sub>e/ha calculated by Murdiyarso et al (2010). Peat extent was obtained for Sumatra  
44 (Wahyunto, 2003), Kalimantan (Wahyunto, 2004) and Papua (Wahyunto, 2006), which are considered to  
45 contain the vast majority of Indonesia's peat soils. Alternative biomass carbon data (WHRC, 2011) and  
46 peat emission factors were explored in a sensitivity analysis (Table SI9).

47 Data were standardized into a single equal-area projection of uniform extent and gridded into 226,348  
48 3km x 3km grid cells across all of Indonesia using ArcGIS 9.3.1. This grid cell resolution was chosen to  
49 comply with size limitations of MS Excel. We removed grid cells for which values were missing from  
50 the agricultural revenue dataset (n=25,431) or other data sets (n=5,451) leaving 195,466 grid cells  
51 representing 91.8% of the land area and 95.8% of the forest area of the original data.

52

### 53 **Comparison of data with other published sources**

54 Observed deforestation in Indonesia from 2000-2005 was 687,000 ha/yr (Figure 1a), producing estimated  
55 emissions from deforestation of 860 MtCO<sub>2</sub>e/yr, of which an estimated 592 MtCO<sub>2</sub>e/yr was from forests  
56 on peat soil. Deforestation compares to estimates that range from 310,000 ha/yr (FAO 2010) to 703,000  
57 ha/yr (Ministry of Forestry, 2008) to 1.87 million ha/yr (FAO 2005) over the 2000-2005 time period, or  
58 1.1 million ha/yr in 2005 (DNPI, 2010). Emissions compare to estimates of 502 MtCO<sub>2</sub>e/yr from  
59 deforestation, of which 186 MtCO<sub>2</sub>e/yr was associated with peat (Ministry of Forestry, 2008); 1.459  
60 GtCO<sub>2</sub>e/yr over the time period from land use, land use change and forestry (CAIT, 2010); and 1.610  
61 GtCO<sub>2</sub>e/yr emissions in 2005 from land use change, of which 770 MtCO<sub>2</sub>e/yr was from peat (DNPI,  
62 2010).

63

### 64 **Econometric methods**

65 We predicted site-level deforestation without carbon payments based on the relationship between the  
66 observed pattern of historical deforestation and spatial variation in sites' geographic and agricultural  
67 characteristics. Our empirical model builds on the theory that land-use decision makers will choose a rate  
68 of conversion from forest to agriculture that maximizes the present discounted value of a future stream of  
69 net benefits and costs of conversion. Given this theoretical framework we regressed percent deforestation  
70 from 2000-2005 on cost and benefit variables for all 166,343 3km x 3km grid cells for which forest cover  
71 was present in the year 2000 (Eq. 1). We proxied for the gross economic benefit of conversion using  
72 estimated net present value of potential gross agricultural revenue. We proxied for fixed and variable  
73 costs of converting forest to agriculture using a constant term and a linear combination of sites' slope,  
74 elevation, natural logarithm of the distance to the nearest road, natural logarithm of the distance to the  
75 nearest provincial capital, and the percent of cell contained within a national park, other protected area,  
76 logging concession, timber concession, or estate crop concession, following empirical literature on  
77 determinants of deforestation (e.g. Nelson and Hellerstein, 1995; Laurence et al 2002; Chomitz and  
78 Thomas 2003; Pfaff et al 2007). In the absence of multi-period data on deforestation and most other

79 explanatory variables, we relied on data on changes in forest cover from a single time period. Eventually  
80 multi-period data sets could be used to isolate changes in deforestation due to changes in agricultural  
81 returns, infrastructure, or legal designation at particular sites. The combination of explanatory variables  
82 included in the regression was selected to maximize the district-level correlation between observed and  
83 predicted deforestation (Table SI7) without directly stratifying by geographic boundaries. The selected  
84 variables also provided the best combination of parsimony and fit, as determined by the Akaike  
85 Information Criterion (AIC) (Table SI7).

86 Recognizing that the statistical relationship between deforestation and site characteristics may vary across  
87 a country as large and geographically diverse as Indonesia, we stratified sites into four classes based on  
88 forest cover, with approximately 42,000 sites in each class (Table SI1). Stratifying based on a larger  
89 number of forest cover classes did not improve the AIC. Explanatory variables (Table SI2) were  
90 interacted with these classes in the regression.

91 We estimated the influence of explanatory variables on deforestation (Eq. 1) using a Poisson quasi-  
92 maximum likelihood estimator (QMLE) (Wooldridge, 2002; Burgess et al), which is theoretically  
93 consistent with 3km x 3km forest cover loss being a count of independent, discrete binary 463m x 463m  
94 forest cover loss/maintenance observations from the remote sensing data. A Poisson model tolerates zero  
95 values, and generates a distribution of predicted values which fits the distribution of observed data, which  
96 is concentrated nearest to zero deforestation and diminishes toward greater levels of deforestation.  
97 Because the data for percent deforestation is slightly overdispersed (mean=0.067; variance=0.078;  
98 n=166,343), we considered a negative binomial regression, resulting in outputs that are highly correlated  
99 with those of the Poisson regression (Table SI5, Table SI7). Standard errors were specified to be robust  
100 to heteroskedasticity. The inclusion of spatially lagged deforestation as an explanatory variable increased  
101 overall explanatory power, but had little effect on the significance or magnitude of coefficients on  
102 observable site characteristics (Table SI7). Alternative functional forms, explanatory variables, and  
103 stratification classes were explored to confirm robustness (Tables SI3-SI6).

104 Explanatory variables used to construct the reference scenario were significantly correlated with observed  
105 deforestation, producing coefficients with expected signs and plausible magnitudes (Table SI3).  
106 Consistent with results widely observed elsewhere, deforestation was found to be higher at lower and  
107 flatter sites, and closer to roads and provincial capitals, controlling for other factors. Deforestation was  
108 also lower in national parks and other protected areas, and higher in timber and estate crop concessions,  
109 controlling for other factors. This likely reflects variation in underlying unobservable site characteristics  
110 associated with the non-random allocation of these land-use designations, in addition to the impact of the  
111 designations themselves (Pfaff et al, 2009). Deforestation was lower in logging concessions, controlling  
112 for other factors, possibly reflecting a logging moratorium issued in May 2002, or that forest degradation  
113 due to selective logging may not have been identified in our deforestation data set.

114 Potential gross agricultural revenue was significantly and positively correlated with observed  
115 deforestation; this relationship was robust to the use of an alternative data set on forest cover loss (Table  
116 SI6). We examined the impact of potential bias in agricultural revenue data by estimating emission  
117 reductions and revenue at the high and low extremes of the 95% confidence intervals around the  
118 coefficient on the effect of potential gross agricultural revenue on deforestation (Table SI9). We

119 examined the impact of potential noise in agricultural revenue data by selecting a random draw for each  
120 site from the confidence interval around the same coefficient (Table SI9).

121 We used the econometric model (Eq. 1) to predict deforestation at every site in the absence of REDD+  
122 (Eq. 2) (the “reference scenario”). This generates an effective land rental value for every site (Eq. 3),  
123 based not only on potential gross agricultural revenues but also on our proxies fixed and variable land  
124 conversion costs. We adjusted the econometric model based on hypothetical carbon payments to predict  
125 deforestation at every site under a REDD+ program (Figure SI1) (Eq. 4,6).

## 126 **Parameter choices and sensitivities**

127 We selected a default price of 2008 US\$10/tCO<sub>2</sub>e for ease of comparison with other studies. Our  
128 estimates of abatement in response to a \$10/tCO<sub>2</sub>e carbon price fall within the range of estimates of  
129 abatement potential from REDD+ in Southeast Asia produced by global forestry and land-use models: 50  
130 MtCO<sub>2</sub>e/yr in the Generalized Comprehensive Mitigation Assessment Process Model (GCOMAP); 70  
131 MtCO<sub>2</sub>e/yr in the Dynamic Integrated Model of Forestry and Alternative Land Use (DIMA); 875  
132 MtCO<sub>2</sub>e/yr in the Global Timber Model (GTM) [7]; and 233 MtCO<sub>2</sub>e/yr in a bottom-up model of  
133 REDD+ in smallholder landscapes and fire prevention in Indonesia [20].

134 The effective elasticity parameter was calibrated so that leakage of deforested area matched estimates  
135 generated by a 35-sector, 5-region general equilibrium model of the Indonesian economy (IRSA-  
136 Indonesia-5; [50]), in which a 10% exogenous decrease in estate crop production in each one of five  
137 regions in turn (Java/Bali; Sumatra; Kalimantan; Sulawesi; Eastern Indonesia) produced an average  
138 increase in production elsewhere within the country of 18% of the initial decrease in production.  
139 Variations in agricultural prices and the pressure for intranational leakage were explored in a sensitivity  
140 analysis (Table SI9).

141 We tested the sensitivity of estimated impacts to a variety of policy variables (Table SI8) and model  
142 parameters (Table SI9). Higher carbon prices resulted in greater abatement. We selected 20% revenue  
143 sharing and 20% responsibility sharing as illustrative values in the improved voluntary incentive  
144 structure. Greater levels of revenue sharing resulted in less overall abatement but augmented a  
145 programmatic budget surplus, while greater levels of responsibility sharing resulted in greater  
146 participation, greater overall abatement, and an augmented programmatic budget surplus. Optimal levels  
147 of revenue and responsibility sharing would depend on a country’s relative preference for program  
148 effectiveness and equity of distribution of revenues across scales. Scaling sub-national reference levels  
149 downward uniformly from business-as-usual rates resulted in less participation and less overall abatement  
150 but augmented a programmatic budget surplus.

151  
152 In the absence of spatially explicit data, we proxied for potential transaction costs through three  
153 sensitivity analyses (Table SI9). District-level implementation and monitoring costs diminished net  
154 reductions and revenue very little, as some small districts opted out but larger districts continued to  
155 participate in REDD+. On the other hand, site-level costs (e.g. those related to enforcement, management  
156 or forgone logging revenue) had a stronger dampening effect on emission reductions. Governance and  
157 institutional barriers, proxied through increases to local decision makers’ preference for agricultural  
158 revenue relative to carbon revenue, also resulted in diminished emission reductions.

159

160 The model developed here can potentially be extended to examine a number of interesting topics beyond  
161 the scope of the current analysis, including a richer suite of land-use changes (e.g. logging and forest  
162 degradation; reforestation) and policy decisions (e.g. land tenure; infrastructure; agricultural subsidies and  
163 taxes; conservation of biodiversity and ecosystem services).

164

165 **References**

- 166 Baccini A, Goetz SJ, Walker WS, Laporte NT, Sun M, Sulla-Menashe D, Hackler J, Beck P, Dubayah R,  
167 Friedl M, Samanta S, Houghton RA. New satellite-based estimates of tropical carbon stocks and CO<sub>2</sub>  
168 emissions from deforestation. Submitted. <http://www.whrc.org/mapping/pantropical/modis.html>
- 169 Burgess R, Hansen M, Olken B, Potapov P, Sieber, S. The political economy of deforestation in the  
170 tropics. Working paper.
- 171 Chomitz KM, Thomas, TS (2003) Determinants of Land Use in Amazonia: A Fine-Scale Spatial  
172 Analysis. *Am J Agric Econ* 85:1016.
- 173 CAIT Version 8.0. (2011) WRI, Washington.
- 174 DNPI (2010) *Indonesia's greenhouse gas abatement cost curve*. Dewan Nasional Perubahan Iklim,  
175 Indonesia.
- 176 FAO (2005) Global Forest Resources Assessment 2005. FAO, Rome.
- 177 FAO/IIASA/ISRIC/ISSCAS/JRC (2008) Harmonized World Soil Database (version 1.0). FAO,  
178 Rome/IIASA, Laxenburg.
- 179 FAO (2010). *Global forest resources assessment 2010 country reports*.
- 180 Fischer G, Van Velthuisen H, Nachergaele F, Medow S (2000). Global Agro-Ecological Zones. FAO,  
181 Rome/IIASA, Laxenbourg.
- 182 Gibbs HK, Brown S (2007) Geographical distribution of biomass carbon Tropical Southeast Asian  
183 Forests: An Updated Database for 2000. Oak Ridge National Laboratory, Oak Ridge, TN.  
184 <http://cdiac.ornl.gov/epubs/ndp/ndp068/ndp068b.html>
- 185 Grieg-Gran M (2006). The Cost of Avoiding Deforestation. IIED. London, United Kingdom. 20 pp.
- 186 Hansen M, DeFries RS, Townshend JRG, Carroll M, Dimiceli C, Sohlberg RA (2003) Global Percent  
187 Tree Cover at a Spatial Resolution of 500 Meters: First Results of the MODIS Vegetation Continuous  
188 Fields Algorithm. *Earth Interact*, 7(10):1-15.
- 189 Hansen MC, Stehman SV, Potapov PV, Loveland TR, Townshend JRG, DeFries RS, Pittman, KW, Stolle  
190 F, Steininger MK, Carroll M, Dimiceli C (2008) Humid tropical forest clearing from 2000 to 2005  
191 quantified using multi-temporal and multi-resolution remotely sensed data. *Proc Natl Acad Sci USA*  
192 105(27):9439-9444.
- 193 Hansen MC, Stehman SV, Potapov PV, Arunarwati B, Stolle F, Pittman K (2009) Quantifying changes in  
194 the rates of forest clearing in Indonesia from 1990 to 2005 using remotely sensed data sets. *Environ Res*  
195 *Lett* 4.
- 196 Harper GJ, Steininger MK, Tucker CJ, Juhn D, Hawkins F (2007) Fifty years of deforestation and forest  
197 fragmentation in Madagascar. *Environ Conserv* 34:325-333.

- 198 Hoojier A, Page S, Canadell JG, Silvius M, Kwadijk J, Wosten H, Jauhiainen J (2010) Current and future  
199 CO<sub>2</sub> emissions from drained peatlands in Southeast Asia. *Biogeosciences*, 7, 1505-1514.
- 200 Jarvis A, Reuter HI, Nelson A, Guevara E (2008) Hole-filled seamless SRTM data V4. CIAT,
- 201 Killeen TJ, Calderon V, Soria L, Quezada B., Steininger MK, Harper GJ, Solórzano LA, Tucker CJ  
202 (2007) Thirty Years of Land-cover Change in Bolivia. *Ambio* 36(7):600-606.
- 203 Kindermann GE, Obersteiner M, Sohngen B, Sathaye J, Andrasko K, Rametsteiner E, Schlamadinger B,  
204 Wunder S, Beach R (2008) Global cost estimates of reducing carbon emissions through avoided  
205 deforestation. *Proc Natl Acad Sci USA* 105(30):10302-10307.
- 206 Laurance WF, Albernaz AKM, Schroth G, Fearnside PM, Bergen S, Venticinqué EM, Da Costa C (2002)  
207 Predictors of Deforestation in the Brazilian Amazon. *J Biogeogr* 29:737.
- 208 Leimgruber P, Kelly DS, Steininger MK, Brunner J, Müller T, Songer M (2005) Forest cover change  
209 patterns in Myanmar (Burma) 1990–2000. *Environ Conserv* 32(4):356–364.
- 210 Miettinen J, Shi C, Liew SC (2011) Deforestation rates in insular Southeast Asia between 2000 and 2010.  
211 *Global Change Biol* 17:2261-2270.
- 212 Miettinen J, Shi C, Tan WJ, Liew SC (2012) 2010 land cover map of insular Southeast Asia in 250-m  
213 spatial resolution. *Remote Sensing Lett* 3(1):11-20.
- 214 Minnemeyer S, Boisrobert L, Stolle F, Muliastira YIKD, Hansen M, Arunarwati B, Prawijiwuri G,  
215 Purwanto J, Awaliyan R (2009) *Interactive Atlas of Indonesia's Forests*. WRI, Washington.
- 216 Ministry of Forestry (2008) *Reducing emissions from deforestation and forest degradation in Indonesia*.  
217 Jakarta, Indonesia.
- 218 Murdiyarso D, Hergoualc'h K, and Verchot LV (2010) Opportunities for reducing greenhouse gas  
219 emissions in tropical peatlands. *Proc Nat Acad Sci*,107(46):19655-19660.
- 220 Naidoo R, Iwamura T (2007) Global-scale mapping of economic benefits from agricultural lands:  
221 Implications for conservation priorities. *Biol Conserv*, 140(1-2):40-49.
- 222 Nelson GC, Hellerstein D (1995) Do Roads Cause Deforestation? Using Satellite Images in Econometric  
223 Analysis of Land Use. *Am J Agric Econ*.
- 224 NGA (2000). National Geospatial-Intelligence Agency - Vector Smart Map (VMap) Level 0.
- 225 Pfaff A, Robalino J, Walker R, Aldrich S, Caldas M, Reis E, Perz S, Bohrer C, Arima E, Laurance, W,  
226 Kirby K (2007) Road investments, spatial spillovers, and deforestation in the Brazilian Amazon. *J Reg  
227 Sci* 47(1):109-123.
- 228 Pfaff A, Robalino J, Sanchez-Azofeifa A, Andam K, Ferraro P (2009) Location Affects Protection:  
229 Observable Characteristics Drive Park Impacts in Costa Rica. *BE J Econ Anal Policy*.

- 230 Saatchi SS, Harris NL, Brown S, Lefsky M, Mitchard ETA, Salas W, Zutta BR, Buermann W, Lewis SL,  
231 Hagen S, Petrova S, White L, Silman M, Morel A (2011) Benchmark map of forest carbon stocks in  
232 tropical regions across three continents. *Proc Nat Acad Sci*, 108(24):9899-9904.
- 233 Wahyunto, Ritung S, Subagjo H (2003) Peatland Distribution and Carbon Content in Sumatera, 1990 –  
234 2002. Wetlands International.
- 235 Wahyunto, Ritung S, Subagjo H (2004) Peatland Distribution Area and Carbon Content in Kalimantan,  
236 2000 – 2002. Wetlands International.
- 237 Wahyunto, Heryanto B, Bektı H, Widiastuti F (2006) Peatland Distribution, Area and Carbon Content in  
238 Papua, 2000 - 2001. Wetlands International.
- 239 Wooldridge JM (2002) Econometric analysis of cross section and panel data. MIT Press, Cambridge.
- 240



241 **Table SII – Forest cover classes**

| Forest cover class | Minimum forest cover within class | Maximum forest cover within class | Number of cells within class |
|--------------------|-----------------------------------|-----------------------------------|------------------------------|
| No forest          | 0.0%                              | 0.0%                              | 29,123                       |
| Low                | 2.8%                              | 27.8%                             | 40,141                       |
| Low-medium         | 30.6%                             | 69.4%                             | 43,055                       |
| Medium-high        | 72.2%                             | 94.4%                             | 43,141                       |
| High               | 97.2%                             | 100.0%                            | 40,006                       |

242

243

244 **Table SI2 – Summary statistics**

| Variable                                      | Forest cover class | Mean    | Std. Dev. | Min | Max       |
|-----------------------------------------------|--------------------|---------|-----------|-----|-----------|
| Deforestation rate (%/5yr)                    | None               | -       | -         | -   | -         |
|                                               | Low                | 10.1%   | 36.9%     | 0%  | 1251%*    |
|                                               | Low-medium         | 5.5%    | 21.0%     | 0%  | 297%      |
|                                               | Medium-high        | 3.4%    | 16.7%     | 0%  | 288%      |
|                                               | High               | 2.4%    | 13.9%     | 0%  | 248%      |
| NPV of potential agricultural revenue (\$/ha) | None               | \$4,335 | \$5,104   | \$- | \$187,644 |
|                                               | Low                | \$2,811 | \$3,675   | \$- | \$187,644 |
|                                               | Low-medium         | \$2,173 | \$3,880   | \$- | \$187,644 |
|                                               | Medium-high        | \$1,644 | \$2,354   | \$- | \$164,483 |
|                                               | High               | \$1,304 | \$1,386   | \$- | \$91,738  |
| Slope (°)                                     | None               | 3°      | 4°        | 0°  | 36°       |
|                                               | Low                | 4°      | 5°        | 0°  | 40°       |
|                                               | Low-medium         | 7°      | 7°        | 0°  | 40°       |
|                                               | Medium-high        | 10°     | 8°        | 0°  | 37°       |
|                                               | High               | 12°     | 7°        | 0°  | 35°       |
| Elevation (m)                                 | None               | 153     | 457       | 0   | 4496      |
|                                               | Low                | 177     | 420       | 0   | 4375      |
|                                               | Low-medium         | 348     | 585       | 0   | 4046      |
|                                               | Medium-high        | 487     | 581       | 0   | 3794      |
|                                               | High               | 565     | 540       | 0   | 3345      |
| Distance from road (km)                       | None               | 37      | 76        | 0   | 606       |
|                                               | Low                | 39      | 71        | 0   | 603       |
|                                               | Low-medium         | 67      | 88        | 0   | 602       |
|                                               | Medium-high        | 80      | 91        | 0   | 600       |
|                                               | High               | 85      | 96        | 0   | 514       |
| Distance from capital (km)                    | None               | 164     | 157       | 1   | 816       |
|                                               | Low                | 183     | 159       | 1   | 790       |
|                                               | Low-medium         | 238     | 167       | 3   | 778       |
|                                               | Medium-high        | 260     | 162       | 1   | 755       |
|                                               | High               | 283     | 177       | 3   | 752       |
| National park (%)                             | None               | 3%      | 16%       | 0%  | 100%      |
|                                               | Low                | 3%      | 16%       | 0%  | 100%      |
|                                               | Low-medium         | 5%      | 20%       | 0%  | 100%      |
|                                               | Medium-high        | 8%      | 26%       | 0%  | 100%      |
|                                               | High               | 13%     | 33%       | 0%  | 100%      |
| Other protected area (%)                      | None               | 2%      | 14%       | 0%  | 100%      |
|                                               | Low                | 3%      | 16%       | 0%  | 100%      |
|                                               | Low-medium         | 4%      | 19%       | 0%  | 100%      |
|                                               | Medium-high        | 5%      | 20%       | 0%  | 100%      |
|                                               | High               | 6%      | 22%       | 0%  | 100%      |
| Logging concession (%)                        | None               | 4%      | 18%       | 0%  | 100%      |
|                                               | Low                | 1%      | 11%       | 0%  | 100%      |
|                                               | Low-medium         | 4%      | 18%       | 0%  | 100%      |
|                                               | Medium-high        | 5%      | 22%       | 0%  | 100%      |
|                                               | High               | 5%      | 21%       | 0%  | 100%      |
| Timber concession (%)                         | None               | 3%      | 17%       | 0%  | 100%      |
|                                               | Low                | 1%      | 11%       | 0%  | 100%      |
|                                               | Low-medium         | 1%      | 11%       | 0%  | 100%      |
|                                               | Medium-high        | 1%      | 8%        | 0%  | 100%      |

\* Deforestation rate exceeds 100% in some cases because total deforestation rates from MODIS data were scaled based on LANDSAT data. See Data.

|                                   |             |     |     |    |      |
|-----------------------------------|-------------|-----|-----|----|------|
|                                   | High        | 0%  | 6%  | 0% | 100% |
| Estate crop concession (%)        | None        | 3%  | 16% | 0% | 100% |
|                                   | Low         | 1%  | 9%  | 0% | 100% |
|                                   | Low-medium  | 1%  | 7%  | 0% | 100% |
|                                   | Medium-high | 0%  | 4%  | 0% | 100% |
|                                   | High        | 0%  | 3%  | 0% | 100% |
| Forest zoned for conservation (%) | None        | 5%  | 21% | 0% | 100% |
|                                   | Low         | 1%  | 11% | 0% | 100% |
|                                   | Low-medium  | 3%  | 16% | 0% | 100% |
|                                   | Medium-high | 5%  | 21% | 0% | 100% |
|                                   | High        | 6%  | 24% | 0% | 100% |
| Forest zoned for protection (%)   | None        | 4%  | 20% | 0% | 100% |
|                                   | Low         | 1%  | 9%  | 0% | 100% |
|                                   | Low-medium  | 1%  | 12% | 0% | 100% |
|                                   | Medium-high | 2%  | 13% | 0% | 100% |
|                                   | High        | 2%  | 15% | 0% | 100% |
| Forest zoned for production (%)   | None        | 15% | 36% | 0% | 100% |
|                                   | Low         | 5%  | 21% | 0% | 100% |
|                                   | Low-medium  | 7%  | 25% | 0% | 100% |
|                                   | Medium-high | 7%  | 26% | 0% | 100% |
|                                   | High        | 7%  | 25% | 0% | 100% |
| Forest zoned for conversion (%)   | None        | 10% | 30% | 0% | 100% |
|                                   | Low         | 3%  | 16% | 0% | 100% |
|                                   | Low-medium  | 3%  | 18% | 0% | 100% |
|                                   | Medium-high | 2%  | 16% | 0% | 100% |
|                                   | High        | 2%  | 12% | 0% | 100% |

245

246

247

248 **Table SI3 – Determinants of forest cover loss: Model specifications 1-3.** Robust standard errors;  
 249 *n=166,297. A coefficient of 0.1 indicates that each unit increase in the driver variable is correlated with*  
 250 *a 10% increase in the probability of deforestation.*

| Regression Model                                  |                    | (1)                                                  |         | (2)                                                           |         | (3)                                                             |         |
|---------------------------------------------------|--------------------|------------------------------------------------------|---------|---------------------------------------------------------------|---------|-----------------------------------------------------------------|---------|
| Description                                       |                    | Poisson; stratified by forest cover                  |         | Poisson; stratified by forest cover; no concession boundaries |         | Poisson; stratified by forest cover; includes forest allocation |         |
| Dependent variable                                |                    | Deforestation (%/5yr) 2000-2005 (Hansen et al. 2009) |         | Deforestation (%/5yr) 2000-2005 (Hansen et al. 2009)          |         | Deforestation (%/5yr) 2000-2005 (Hansen et al. 2009)            |         |
| Driver                                            | Forest cover class | Coefficient                                          | z value | Coefficient                                                   | z value | Coefficient                                                     | z value |
| NPV of potential agricultural revenue (1000\$/ha) | Low                | 0.0142                                               | 6.15    | 0.0153                                                        | 6.82    | 0.0144                                                          | 6.08    |
|                                                   | Low-medium         | 0.0116                                               | 5.15    | 0.0144                                                        | 7.39    | 0.0134                                                          | 6.31    |
|                                                   | Medium-high        | 0.0161                                               | 3.63    | 0.0213                                                        | 5.36    | 0.0205                                                          | 5.26    |
|                                                   | High               | 0.0732                                               | 8.38    | 0.0742                                                        | 8.65    | 0.0713                                                          | 8.23    |
| Slope (°)                                         | Low                | -0.024                                               | -3.26   | -0.031                                                        | -4.28   | -0.026                                                          | -3.56   |
|                                                   | Low-medium         | -0.079                                               | -11.52  | -0.091                                                        | -12.91  | -0.086                                                          | -12.25  |
|                                                   | Medium-high        | -0.119                                               | -20.66  | -0.133                                                        | -21.94  | -0.126                                                          | -20.72  |
|                                                   | High               | -0.143                                               | -20.44  | -0.151                                                        | -21.15  | -0.146                                                          | -20.03  |
| Elevation (m)                                     | Low                | -0.00185                                             | -12.09  | -0.00197                                                      | -12.64  | -0.00186                                                        | -11.97  |
|                                                   | Low-medium         | -0.00152                                             | -11.54  | -0.00167                                                      | -11.97  | -0.00169                                                        | -11.74  |
|                                                   | Medium-high        | -0.00165                                             | -17.04  | -0.00192                                                      | -17.62  | -0.00194                                                        | -17.56  |
|                                                   | High               | -0.00259                                             | -18.19  | -0.00291                                                      | -18.58  | -0.00285                                                        | -18.05  |
| Log distance from                                 | Low                | 0.007                                                | 0.63    | 0.019                                                         | 1.70    | -0.048                                                          | -4.2    |
|                                                   | Low-medium         | -0.069                                               | -6.59   | -0.088                                                        | -9.19   | -0.167                                                          | -15.84  |
|                                                   | Medium-high        | -0.125                                               | -8.32   | -0.202                                                        | -16.30  | -0.279                                                          | -18.76  |
|                                                   | High               | -0.190                                               | -8.26   | -0.272                                                        | -14.31  | -0.348                                                          | -16.57  |
| Log distance from                                 | Low                | -0.098                                               | -4.8    | -0.105                                                        | -5.44   | -0.142                                                          | -7.21   |
|                                                   | Low-medium         | -0.325                                               | -17.55  | -0.338                                                        | -19.10  | -0.338                                                          | -18.75  |
|                                                   | Medium-high        | -0.293                                               | -11.14  | -0.313                                                        | -12.07  | -0.245                                                          | -9.77   |
|                                                   | High               | 0.042                                                | 1.15    | 0.013                                                         | 0.37    | 0.079                                                           | 2.27    |
| National park (%)                                 | Low                | -0.688                                               | -5.75   | -0.815                                                        | -6.82   |                                                                 |         |
|                                                   | Low-medium         | -0.378                                               | -3.63   | -0.521                                                        | -5.01   |                                                                 |         |
|                                                   | Medium-high        | -0.684                                               | -6.19   | -0.833                                                        | -7.45   |                                                                 |         |
|                                                   | High               | -0.160                                               | -1.6    | -0.270                                                        | -2.71   |                                                                 |         |
| Other protected                                   | Low                | -0.570                                               | -5.19   | -0.701                                                        | -6.43   |                                                                 |         |
|                                                   | Low-medium         | -0.615                                               | -5.26   | -0.722                                                        | -6.21   |                                                                 |         |
|                                                   | Medium-high        | -0.865                                               | -9.72   | -0.936                                                        | -10.44  |                                                                 |         |
|                                                   | High               | -0.945                                               | -9.38   | -1.044                                                        | -10.57  |                                                                 |         |
| Logging concession                                | Low                | -0.2907                                              | -2.95   |                                                               |         |                                                                 |         |
|                                                   | Low-medium         | -0.4221                                              | -6.94   |                                                               |         |                                                                 |         |
|                                                   | Medium-high        | -0.2799                                              | -4.7    |                                                               |         |                                                                 |         |
|                                                   | High               | -0.03339                                             | -0.55   |                                                               |         |                                                                 |         |
| Timber concession                                 | Low                | 0.4302                                               | 6.01    |                                                               |         |                                                                 |         |
|                                                   | Low-medium         | 0.8694                                               | 15.21   |                                                               |         |                                                                 |         |
|                                                   | Medium-high        | 1.17                                                 | 16.92   |                                                               |         |                                                                 |         |
|                                                   | High               | 1.008                                                | 9.4     |                                                               |         |                                                                 |         |
| Estate crop                                       | Low                | 0.999                                                | 14.24   |                                                               |         |                                                                 |         |
|                                                   | Low-medium         | 1.143                                                | 16.04   |                                                               |         |                                                                 |         |
|                                                   | Medium-high        | 1.152                                                | 10.27   |                                                               |         |                                                                 |         |
|                                                   | High               | 1.233                                                | 7.3     |                                                               |         |                                                                 |         |
| Forest zoned for                                  | Low                |                                                      |         |                                                               |         | 0.318                                                           | 2.73    |
|                                                   | Low-medium         |                                                      |         |                                                               |         | 0.527                                                           | 6.05    |
|                                                   | Medium-high        |                                                      |         |                                                               |         | 0.361                                                           | 3.39    |
|                                                   | High               |                                                      |         |                                                               |         | 0.651                                                           | 4.77    |
| Forest zoned for                                  | Low                |                                                      |         |                                                               |         | -0.210                                                          | -1.88   |

|                             |             |           |       |           |       |           |       |
|-----------------------------|-------------|-----------|-------|-----------|-------|-----------|-------|
|                             | Low-medium  |           |       |           |       | -0.094    | -1.03 |
|                             | Medium-high |           |       |           |       | -0.125    | -1.17 |
|                             | High        |           |       |           |       | 0.362     | 2.77  |
| Forest zoned for            | Low         |           |       |           |       | 0.699     | 14.66 |
|                             | Low-medium  |           |       |           |       | 0.661     | 14.12 |
|                             | Medium-high |           |       |           |       | 0.480     | 6.7   |
|                             | High        |           |       |           |       | 0.531     | 4.52  |
| Forest zoned for            | Low         |           |       |           |       | 0.628     | 11.61 |
|                             | Low-medium  |           |       |           |       | 0.660     | 11.82 |
|                             | Medium-high |           |       |           |       | 0.585     | 7.02  |
|                             | High        |           |       |           |       | 0.959     | 7.76  |
| Forest cover class<br>(0/1) | Low         | 0.004     | 0.02  | -0.525    | -2.39 | 0.136     | 0.57  |
|                             | Low-medium  | 1.182     | 5.25  | 0.814     | 3.70  | 1.265     | 5.35  |
|                             | Medium-high | 1.305     | 5.34  | 1.215     | 5.01  | 1.371     | 5.37  |
|                             | High        | (dropped) |       | (dropped) |       | (dropped) |       |
| Intercept                   |             | -1.729    | -8.35 | -1.062    | -5.26 | -1.743    | -7.93 |

251

252

253 **Table SI4 – Determinants of forest cover loss: Model specifications 4-6.** Robust standard errors;  
 254 n=166,297. A coefficient of 0.1 indicates that each unit increase in the driver variable is correlated with  
 255 a 10% increase in the probability of deforestation.

| Regression Model                                        |              | (4)                                                        |         | (5)                                                        |         | (6)                                                        |         |
|---------------------------------------------------------|--------------|------------------------------------------------------------|---------|------------------------------------------------------------|---------|------------------------------------------------------------|---------|
| Description                                             |              | Poisson;<br>unstratified                                   |         | Poisson;<br>unstratified;<br>weighted by forest<br>cover   |         | Poisson;<br>stratified by region                           |         |
| Dependent variable                                      |              | Deforestation (%/5yr)<br>2000-2005<br>(Hansen et al. 2009) |         | Deforestation (%/5yr)<br>2000-2005<br>(Hansen et al. 2009) |         | Deforestation (%/5yr)<br>2000-2005<br>(Hansen et al. 2009) |         |
| Driver                                                  | Region       | Coefficient                                                | z value | Coefficient                                                | z value | Coefficient                                                | z value |
| NPV of potential<br>agricultural revenue<br>(1000\$/ha) | All regions  | 0.0162                                                     | 10.93   | 0.0175                                                     | 232     |                                                            |         |
|                                                         | Java         |                                                            |         |                                                            |         | -0.0001                                                    | -0.05   |
|                                                         | Sumatra      |                                                            |         |                                                            |         | 0.024                                                      | 2.97    |
|                                                         | Kalimantan   |                                                            |         |                                                            |         | 0.026                                                      | 2.08    |
|                                                         | Sulawesi     |                                                            |         |                                                            |         | 0.029                                                      | 2.27    |
|                                                         | E. Indonesia |                                                            |         |                                                            |         | 0.025                                                      | 7.14    |
| Slope (°)                                               | All regions  | -0.090                                                     | -24.5   | -0.111                                                     | -788    |                                                            |         |
|                                                         | Java         |                                                            |         |                                                            |         | 0.005                                                      | 0.27    |
|                                                         | Sumatra      |                                                            |         |                                                            |         | -0.119                                                     | -17.93  |
|                                                         | Kalimantan   |                                                            |         |                                                            |         | -0.141                                                     | -14.66  |
|                                                         | Sulawesi     |                                                            |         |                                                            |         | -0.057                                                     | -4.75   |
|                                                         | E. Indonesia |                                                            |         |                                                            |         | -0.021                                                     | -4.16   |
| Elevation (m)                                           | All regions  | -0.00188                                                   | -24.79  | -0.00185                                                   | -687    |                                                            |         |
|                                                         | Java         |                                                            |         |                                                            |         | -0.0019                                                    | -6.88   |
|                                                         | Sumatra      |                                                            |         |                                                            |         | -0.0023                                                    | -15.13  |
|                                                         | Kalimantan   |                                                            |         |                                                            |         | -0.0033                                                    | -10.34  |
|                                                         | Sulawesi     |                                                            |         |                                                            |         | -0.0029                                                    | -10.36  |
|                                                         | E. Indonesia |                                                            |         |                                                            |         | -0.0012                                                    | -13.55  |
| Log distance from                                       | All regions  | -0.064                                                     | -9.80   | -0.098                                                     | -337    |                                                            |         |
|                                                         | Java         |                                                            |         |                                                            |         | 0.041                                                      | 0.33    |
|                                                         | Sumatra      |                                                            |         |                                                            |         | -0.025                                                     | -2.29   |
|                                                         | Kalimantan   |                                                            |         |                                                            |         | 0.121                                                      | 8.06    |
|                                                         | Sulawesi     |                                                            |         |                                                            |         | 0.021                                                      | 0.83    |
|                                                         | E. Indonesia |                                                            |         |                                                            |         | -0.076                                                     | -2.45   |
| Log distance from<br>capital (km)                       | All regions  | -0.204                                                     | -17.11  | -0.231                                                     | -433    |                                                            |         |
|                                                         | Java         |                                                            |         |                                                            |         | 0.059                                                      | 0.38    |
|                                                         | Sumatra      |                                                            |         |                                                            |         | 0.033                                                      | 1.1     |
|                                                         | Kalimantan   |                                                            |         |                                                            |         | 0.104                                                      | 3.6     |
|                                                         | Sulawesi     |                                                            |         |                                                            |         | 0.054                                                      | 1.07    |
|                                                         | E. Indonesia |                                                            |         |                                                            |         | -0.078                                                     | -1.71   |
| National park (%)                                       | All regions  | -0.537                                                     | -9.89   | -0.438                                                     | -196    |                                                            |         |
|                                                         | Java         |                                                            |         |                                                            |         | -1.629                                                     | -4.64   |
|                                                         | Sumatra      |                                                            |         |                                                            |         | -1.170                                                     | -7.27   |
|                                                         | Kalimantan   |                                                            |         |                                                            |         | -1.071                                                     | -7.64   |
|                                                         | Sulawesi     |                                                            |         |                                                            |         | 0.674                                                      | 2.99    |
|                                                         | E. Indonesia |                                                            |         |                                                            |         | 0.318                                                      | 5.81    |
| Other protected area                                    | All regions  | -0.664                                                     | -11.04  | -0.770                                                     | -329    |                                                            |         |
|                                                         | Java         |                                                            |         |                                                            |         | -3.150                                                     | -3.77   |
|                                                         | Sumatra      |                                                            |         |                                                            |         | -0.945                                                     | -7.56   |
|                                                         | Kalimantan   |                                                            |         |                                                            |         | -0.51                                                      | -3.98   |
|                                                         | Sulawesi     |                                                            |         |                                                            |         | -0.536                                                     | -3.34   |
|                                                         | E. Indonesia |                                                            |         |                                                            |         | -0.666                                                     | -7.82   |
| Logging concession                                      | All regions  | -0.3177                                                    | -9.05   | -0.197                                                     | -154    |                                                            |         |
|                                                         | Java         |                                                            |         |                                                            |         | -                                                          | -       |

|                   |              |        |        |        |      |           |       |
|-------------------|--------------|--------|--------|--------|------|-----------|-------|
|                   | Sumatra      |        |        |        |      | 0.170     | 2.37  |
|                   | Kalimantan   |        |        |        |      | -0.627    | -8.96 |
|                   | Sulawesi     |        |        |        |      | -0.662    | -5.26 |
|                   | E. Indonesia |        |        |        |      | -0.003    | -0.1  |
| Timber concession | All regions  | 0.813  | 22.86  | 0.999  | 654  |           |       |
|                   | Java         |        |        |        |      | -         | -     |
|                   | Sumatra      |        |        |        |      | 0.918     | 20.57 |
|                   | Kalimantan   |        |        |        |      | 0.402     | 5.39  |
|                   | Sulawesi     |        |        |        |      | 0.232     | 0.52  |
|                   | E. Indonesia |        |        |        |      | -0.798    | -8.1  |
| Estate crop       | All regions  | 1.107  | 23.99  | 1.152  | 513  |           |       |
|                   | Java         |        |        |        |      | -         | -     |
|                   | Sumatra      |        |        |        |      | 0.681     | 12.11 |
|                   | Kalimantan   |        |        |        |      | 1.287     | 14.08 |
|                   | Sulawesi     |        |        |        |      | 1.188     | 4.69  |
|                   | E. Indonesia |        |        |        |      | -0.017    | -0.09 |
| Region (0/1)      | Java         |        |        |        |      | (dropped) |       |
|                   | Sumatra      |        |        |        |      | 0.790     | 2.21  |
|                   | Kalimantan   |        |        |        |      | 0.062     | 0.26  |
|                   | Sulawesi     |        |        |        |      | 0.233     | 1.25  |
|                   | E. Indonesia |        |        |        |      | 0.215     | 1.44  |
| Intercept         |              | -1.036 | -19.35 | -0.809 | -313 | -3.372    | -4.81 |

256

257

258 **Table SI5 – Determinants of forest cover loss: Model specifications 7-10.** Robust standard errors;  
 259  $n=166,297$ . A coefficient of 0.1 indicates that each unit increase in the driver variable is correlated with  
 260 a 10% increase in the probability of deforestation.

| Regression                                        |                    | (7)                                                  |         | (8)                                                  |         | (9)                                                  |         |
|---------------------------------------------------|--------------------|------------------------------------------------------|---------|------------------------------------------------------|---------|------------------------------------------------------|---------|
| Description                                       |                    | Poisson; stratified by forest cover                  |         | Logit; stratified by forest cover                    |         | Negative binomial; stratified by forest cover        |         |
| Dependent variable                                |                    | Deforestation (%/5yr) 2000-2005 (Hansen et al. 2009) |         | Deforestation (%/5yr) 2000-2005 (Hansen et al. 2009) |         | Deforestation (%/5yr) 2000-2005 (Hansen et al. 2009) |         |
| Explanatory variable                              | Forest cover class | Coefficient                                          | z value | Coefficient                                          | z value | Coefficient                                          | z value |
| NPV of potential agricultural revenue (1000\$/ha) | Low                | 0.0121                                               | 5.03    | 0.0039                                               | 1.41    | 0.0142                                               | 6.14    |
|                                                   | Low-medium         | 0.0104                                               | 4.32    | -0.0028                                              | -1.16   | 0.0116                                               | 5.15    |
|                                                   | Medium-high        | 0.0139                                               | 3.00    | 0.0118                                               | 2.16    | 0.0161                                               | 3.63    |
|                                                   | High               | 0.0512                                               | 4.21    | 0.0795                                               | 9.18    | 0.0733                                               | 8.28    |
| Slope (°)                                         | Low                | -0.017                                               | -2.15   | 0.0021                                               | 0.59    | -0.024                                               | -3.26   |
|                                                   | Low-medium         | -0.072                                               | -10.16  | -0.0352                                              | -16.15  | -0.079                                               | -11.51  |
|                                                   | Medium-high        | -0.108                                               | -18.89  | -0.0457                                              | -23.3   | -0.119                                               | -20.66  |
|                                                   | High               | -0.118                                               | -16.97  | -0.0635                                              | -30.61  | -0.143                                               | -20.44  |
| Elevation (m)                                     | Low                | -0.002                                               | -10.77  | -0.00094                                             | -13.95  | -0.0019                                              | -12.09  |
|                                                   | Low-medium         | -0.001                                               | -9.72   | -0.00040                                             | -13.99  | -0.0015                                              | -11.54  |
|                                                   | Medium-high        | -0.001                                               | -15.3   | -0.00041                                             | -15.85  | -0.0017                                              | -17.05  |
|                                                   | High               | -0.002                                               | -16.47  | -0.00040                                             | -14.07  | -0.0026                                              | -18.19  |
| Log distance from road (km)                       | Low                |                                                      |         | 0.033                                                | 5.08    | 0.007                                                | 0.63    |
|                                                   | Low-medium         |                                                      |         | 0.084                                                | 12.46   | -0.069                                               | -6.6    |
|                                                   | Medium-high        |                                                      |         | 0.184                                                | 23.5    | -0.125                                               | -8.32   |
|                                                   | High               |                                                      |         | 0.256                                                | 26.37   | -0.190                                               | -8.26   |
| Log distance from capital (km)                    | Low                |                                                      |         | 0.068                                                | 5.07    | -0.098                                               | -4.8    |
|                                                   | Low-medium         |                                                      |         | 0.123                                                | 8.51    | -0.325                                               | -17.54  |
|                                                   | Medium-high        |                                                      |         | 0.309                                                | 18.66   | -0.293                                               | -11.12  |
|                                                   | High               |                                                      |         | 0.331                                                | 17.87   | 0.043                                                | 1.18    |
| Remoteness                                        | Low                |                                                      | -3.07   |                                                      |         |                                                      |         |
|                                                   | Low-medium         |                                                      | -18.71  |                                                      |         |                                                      |         |
|                                                   | Medium-high        |                                                      | -15.52  |                                                      |         |                                                      |         |
|                                                   | High               |                                                      | -2.42   |                                                      |         |                                                      |         |
| National park (%)                                 | Low                | -0.565                                               | -4.75   | -0.219                                               | -3.16   | -0.689                                               | -5.75   |
|                                                   | Low-medium         | -0.232                                               | -2.24   | -0.232                                               | -4.24   | -0.378                                               | -3.63   |
|                                                   | Medium-high        | -0.418                                               | -3.84   | -0.275                                               | -6.63   | -0.683                                               | -6.19   |
|                                                   | High               | 0.048                                                | 0.47    | -0.095                                               | -2.62   | -0.159                                               | -1.6    |
| Other protected                                   | Low                | -0.545                                               | -4.78   | -0.096                                               | -1.38   | -0.570                                               | -5.19   |
|                                                   | Low-medium         | -0.764                                               | -7.66   | -0.194                                               | -3.32   | -0.615                                               | -5.27   |
|                                                   | Medium-high        | -0.856                                               | -10.36  | -0.098                                               | -1.82   | -0.865                                               | -9.73   |
|                                                   | High               | -0.763                                               | -7.87   | -0.027                                               | -0.53   | -0.945                                               | -9.38   |
| Logging                                           | Low                | -0.518                                               | -4.75   | -0.370                                               | -8.49   | -0.292                                               | -2.95   |
|                                                   | Low-medium         | -0.450                                               | -2.24   | -0.353                                               | -12.17  | -0.422                                               | -6.95   |
|                                                   | Medium-high        | -0.347                                               | -3.84   | -0.270                                               | -10.24  | -0.280                                               | -4.71   |
|                                                   | High               | 0.096                                                | 0.47    | -0.141                                               | -5.07   | -0.034                                               | -0.56   |
| Timber                                            | Low                | 0.303                                                | -4.78   | 0.050                                                | 1.16    | 0.430                                                | 6.02    |
|                                                   | Low-medium         | 0.762                                                | -7.66   | 0.166                                                | 3.49    | 0.869                                                | 15.21   |
|                                                   | Medium-high        | 0.900                                                | -10.36  | 0.455                                                | 7.02    | 1.170                                                | 16.91   |
|                                                   | High               | 1.134                                                | -7.87   | 0.402                                                | 5.09    | 1.008                                                | 9.41    |
| Estate crop                                       | Low                | 1.062                                                | -4.72   | 0.203                                                | 3.87    | 0.999                                                | 14.23   |
|                                                   | Low-medium         | 1.107                                                | -7.55   | 0.551                                                | 6.89    | 1.143                                                | 16.04   |
|                                                   | Medium-high        | 1.197                                                | -6.56   | 0.779                                                | 6.03    | 1.152                                                | 10.27   |
|                                                   | High               | 1.368                                                | 1.72    | 0.619                                                | 3.72    | 1.233                                                | 7.31    |
| Forest cover                                      | Low                | 0.303                                                | 3.49    | 1.275                                                | 11.03   | 0.008                                                | 0.04    |
|                                                   | Low-medium         | 0.301                                                | 3.45    | 1.740                                                | 14.56   | 1.186                                                | 5.28    |
|                                                   | Medium-high        | 0.352                                                | 3.68    | 0.581                                                | 4.55    | 1.308                                                | 5.35    |



|           | High | (dropped) | (dropped) | (dropped) | (dropped) | (dropped) |       |
|-----------|------|-----------|-----------|-----------|-----------|-----------|-------|
| Intercept |      | -2.571    | -32.36    | -1.868    | -19.35    | -1.734    | -8.37 |

261

262

263 **Table SI6 – Determinants of forest cover loss: Model specifications 10-11.** Robust standard errors;  
 264 *n=166,297. A coefficient of 0.1 indicates that each unit increase in the driver variable is correlated with*  
 265 *a 10% increase in the probability of deforestation.*

| Regression                                        |                    | (10)                                                         |         | (11)                                                 |         |
|---------------------------------------------------|--------------------|--------------------------------------------------------------|---------|------------------------------------------------------|---------|
| Description                                       |                    | Poisson; stratified by forest cover;                         |         | Poisson; stratified by forest cover; spatial lag*    |         |
| Dependent variable                                |                    | Forest cover loss (%/10yr) 2000-2010 (Miettenen et al. 2011) |         | Deforestation (%/5yr) 2000-2005 (Hansen et al. 2009) |         |
| Explanatory variable                              | Forest cover class | Coefficient                                                  | z value | Coefficient                                          | z value |
| NPV of potential agricultural revenue (1000\$/ha) | Low                | 0.0096                                                       | 6.70    | 0.0103                                               | 3.13    |
|                                                   | Low-medium         | 0.0118                                                       | 10.77   | 0.0120                                               | 5.39    |
|                                                   | Medium-high        | 0.0198                                                       | 6.49    | 0.0218                                               | 5.38    |
|                                                   | High               | 0.0380                                                       | 4.98    | 0.0580                                               | 6.51    |
| Slope (°)                                         | Low                | -0.008                                                       | -2.84   | -0.023                                               | -2.97   |
|                                                   | Low-medium         | -0.021                                                       | -10.23  | -0.078                                               | -7.04   |
|                                                   | Medium-high        | -0.017                                                       | -8.21   | -0.106                                               | -19.14  |
|                                                   | High               | -0.013                                                       | -5.23   | -0.106                                               | -16.14  |
| Elevation (m)                                     | Low                | -0.00037                                                     | -8.70   | -0.002                                               | -11.48  |
|                                                   | Low-medium         | -0.00047                                                     | -13.56  | -0.001                                               | -8.44   |
|                                                   | Medium-high        | -0.00084                                                     | -20.11  | -0.002                                               | -16.3   |
|                                                   | High               | -0.00114                                                     | -23.30  | -0.002                                               | -15.93  |
| Log distance from road (km)                       | Low                | -0.045                                                       | -9.30   | 0.000                                                | -0.03   |
|                                                   | Low-medium         | -0.133                                                       | -30.92  | -0.073                                               | -6.49   |
|                                                   | Medium-high        | -0.218                                                       | -39.13  | -0.093                                               | -6.2    |
|                                                   | High               | -0.352                                                       | -45.65  | -0.046                                               | -1.97   |
| Log distance from capital (km)                    | Low                | -0.069                                                       | -7.20   | -0.087                                               | -4.04   |
|                                                   | Low-medium         | -0.251                                                       | -29.11  | -0.269                                               | -8.5    |
|                                                   | Medium-high        | -0.315                                                       | -30.11  | -0.336                                               | -12.1   |
|                                                   | High               | -0.437                                                       | -31.51  | 0.128                                                | 3.82    |
| National park (%)                                 | Low                | 0.039                                                        | 0.90    | -0.643                                               | -5.09   |
|                                                   | Low-medium         | -0.552                                                       | -11.18  | -0.263                                               | -2.58   |
|                                                   | Medium-high        | -0.655                                                       | -14.21  | -0.591                                               | -5.43   |
|                                                   | High               | -0.652                                                       | -13.81  | -0.089                                               | -0.94   |
| Other protected                                   | Low                | -0.425                                                       | -6.51   | -0.491                                               | -4.44   |
|                                                   | Low-medium         | -0.491                                                       | -9.05   | -0.502                                               | -4.34   |
|                                                   | Medium-high        | -0.587                                                       | -9.83   | -0.767                                               | -9.43   |
|                                                   | High               | -1.017                                                       | -12.50  | -0.600                                               | -5.71   |
| Logging                                           | Low                | 0.108                                                        | 3.96    | -0.254                                               | -2.55   |
|                                                   | Low-medium         | -0.203                                                       | -9.77   | -0.449                                               | -4.93   |
|                                                   | Medium-high        | -0.407                                                       | -17.34  | -0.190                                               | -3.44   |
|                                                   | High               | -0.302                                                       | -9.51   | 0.041                                                | 0.87    |
| Timber                                            | Low                | 0.482                                                        | 21.38   | 0.314                                                | 4.07    |
|                                                   | Low-medium         | 0.306                                                        | 14.26   | 0.747                                                | 11.45   |
|                                                   | Medium-high        | 0.505                                                        | 18.94   | 1.062                                                | 14.88   |
|                                                   | High               | 0.703                                                        | 17.56   | 0.407                                                | 4.17    |
| Estate crop                                       | Low                | 0.696                                                        | 31.41   | 0.843                                                | 9.47    |
|                                                   | Low-medium         | 0.769                                                        | 31.82   | 0.972                                                | 12.87   |
|                                                   | Medium-high        | 0.774                                                        | 17.51   | 0.999                                                | 9.73    |
|                                                   | High               | 0.808                                                        | 11.14   | 0.258                                                | 1.63    |
| Forest cover                                      | Low                | (dropped)                                                    |         | (dropped)                                            |         |
|                                                   | Low-medium         | 1.129                                                        | 17.94   | 1.516                                                | 6.90    |
|                                                   | Medium-high        | 1.472                                                        | 20.85   | 2.370                                                | 9.79    |
|                                                   | High               | 2.101                                                        | 23.52   | 2.802                                                | 11.47   |
| Eastern adjacent deforestation                    | Low                |                                                              |         | 0.519                                                | 8.42    |
|                                                   | Low-medium         |                                                              |         | 0.807                                                | 9.97    |
|                                                   | Medium-high        |                                                              |         | 0.711                                                | 7.64    |

|           | High   |       | 1.815  | 45.45  |
|-----------|--------|-------|--------|--------|
| Intercept | -0.405 | -8.77 | -3.339 | -16.92 |

266 \*The spatial lag regression includes as a regressor the deforestation rate of the cell immediately adjacent  
267 to the east, where applicable. n=163,464.

268 **Table SI7 – Model specifications compared.**

| Regression Model                                                                                                | (1)            | (2)            | (3)            | (4)            | (5)            | (6)            | (7)            | (8)            | (9)            | (10)           | (11)           |
|-----------------------------------------------------------------------------------------------------------------|----------------|----------------|----------------|----------------|----------------|----------------|----------------|----------------|----------------|----------------|----------------|
| Correlation coefficient (R) between modeled and observed deforestation (between modeled and observed emissions) |                |                |                |                |                |                |                |                |                |                |                |
| Site-level                                                                                                      | 0.34<br>(0.41) | 0.29<br>(0.35) | 0.30<br>(0.36) | 0.33<br>(0.39) | 0.33<br>(0.40) | 0.39<br>(0.45) | 0.19<br>(0.22) | 0.09<br>(0.22) | 0.34<br>(0.41) | -<br>(-)       | 0.24<br>(0.31) |
| District-level                                                                                                  | 0.68<br>(0.72) | 0.59<br>(0.63) | 0.63<br>(0.66) | 0.63<br>(0.67) | 0.66<br>(0.70) | 0.78<br>(0.82) | 0.52<br>(0.52) | 0.40<br>(0.48) | 0.68<br>(0.72) | -<br>(-)       | 0.83<br>(0.88) |
| Province-level                                                                                                  | 0.81<br>(0.84) | 0.72<br>(0.73) | 0.77<br>(0.78) | 0.77<br>(0.79) | 0.80<br>(0.83) | 0.92<br>(0.95) | 0.63<br>(0.63) | 0.55<br>(0.59) | 0.81<br>(0.84) | -<br>(-)       | 0.92<br>(0.95) |
| Region-level                                                                                                    | 0.82<br>(0.79) | 0.74<br>(0.67) | 0.79<br>(0.73) | 0.78<br>(0.73) | 0.82<br>(0.78) | 0.98<br>(0.97) | 0.66<br>(0.54) | 0.62<br>(0.55) | 0.82<br>(0.79) | -<br>(-)       | 0.93<br>(0.93) |
| National total deforestation (1000ha/yr; observed=687)                                                          | 692            | 693            | 695            | 710            | 685            | 705            | 531            | 8862           | 692            |                | 342            |
| National total emissions (million tCO <sub>2</sub> e/yr; observed=860)                                          | 809            | 802            | 819            | 820            | 801            | 831            | 586            | 8,149          | 809            | 1,591          | 411            |
| R <sup>2</sup>                                                                                                  | 0.14           | 0.12           | 0.13           | 0.13           | 0.17           | 0.16           | 0.12           | 0.08           | -              | 0.14           | 0.21           |
| AIC                                                                                                             | 58,805         | 59,961         | 59,427         | 59,310         | 2,380,000      | 57,209         | 48,969         | 212,827        | 58,806         | 112,362        | 53,251         |
| BIC                                                                                                             | 59,246         | 60,282         | 59,827         | 59,420         | 2,380,000      | 57,730         | 49,365         | 213,268        | 59,257         | 112,792        | 53,731         |
| Correlation coefficient (R) between modeled deforestation (emissions) and model (1)                             |                |                |                |                |                |                |                |                |                |                |                |
| Site-level                                                                                                      | 1.00<br>(1.00) | 0.83<br>(0.86) | 0.80<br>(0.83) | 0.95<br>(0.97) | 0.97<br>(0.98) | 0.86<br>(0.90) | 0.83<br>(0.80) | 0.28<br>(0.57) | 1.00<br>(1.00) | 0.75<br>(0.87) | 0.21<br>(0.25) |
| District-level                                                                                                  | 1.00<br>(1.00) | 0.98<br>(0.98) | 0.98<br>(0.98) | 0.99<br>(0.99) | 1.00<br>(1.00) | 0.93<br>(0.94) | 0.94<br>(0.91) | 0.72<br>(0.83) | 1.00<br>(1.00) | 0.92<br>(0.96) | 0.94<br>(0.92) |
| Province-level                                                                                                  | 1.00<br>(1.00) | 0.99<br>(0.98) | 0.99<br>(0.99) | 1.00<br>(0.99) | 1.00<br>(1.00) | 0.95<br>(0.95) | 0.96<br>(0.94) | 0.85<br>(0.88) | 1.00<br>(1.00) | 0.96<br>(0.98) | 0.97<br>(0.97) |
| Region-level                                                                                                    | 1.00<br>(1.00) | 0.99<br>(0.99) | 1.00<br>(0.99) | 1.00<br>(0.99) | 1.00<br>(1.00) | 0.90<br>(0.91) | 0.96<br>(0.93) | 0.83<br>(0.87) | 1.00<br>(1.00) | 0.98<br>(0.99) | 0.97<br>(0.96) |

269

270 **Table SI8 – Sensitivity of impacts to key policy variables.** Results are outputs of OSIRIS-Indonesia  
 271 v1.5 using the following default parameter assumptions: “effective” price elasticity of demand for frontier  
 272 agriculture=3.8; exogenous agricultural price increase=0%; peat emission factor=1474 tCO<sub>2</sub>e/ha; social  
 273 preference for agricultural revenue=1.0; start-up and transaction costs=\$0.

|                                                       |                        | \$5/tCO <sub>2</sub> e |          |         | \$10/tCO <sub>2</sub> e |          |         | \$20/tCO <sub>2</sub> e |           |          |
|-------------------------------------------------------|------------------------|------------------------|----------|---------|-------------------------|----------|---------|-------------------------|-----------|----------|
|                                                       |                        | A                      | N        | D       | A                       | N        | D       | A                       | N         | D        |
| <b>Policy variables</b>                               |                        |                        |          |         |                         |          |         |                         |           |          |
| <b>Accounting scale; reference level design</b>       | Site-scale; historical | 32                     | -\$3,003 | \$3,162 | 62                      | -\$5,970 | \$6,590 | 114                     | -\$11,656 | \$13,929 |
|                                                       | Site-scale; BAU        | 115                    | -\$35    | \$612   | 199                     | -\$125   | \$2,117 | 303                     | -\$476    | \$6,543  |
|                                                       | District; historical   | 56                     | -\$1,703 | \$1,983 | 105                     | -\$3,356 | \$4,408 | 182                     | -\$6,446  | \$10,088 |
|                                                       | District; BAU*         | 117                    | -\$24    | \$608   | 202                     | -\$77    | \$2,095 | 304                     | -\$331    | \$6,409  |
|                                                       | Province; historical   | 69                     | -\$1,172 | \$1,518 | 115                     | -\$2,392 | \$3,456 | 192                     | -\$4,686  | \$8,529  |
|                                                       | Province; BAU          | 116                    | -\$19    | \$599   | 205                     | -\$41    | \$2,096 | 310                     | -\$198    | \$6,392  |
| <b>Revenue sharing</b>                                | 0%*                    | 117                    | -\$24    | \$608   | 202                     | -\$77    | \$2,095 | 304                     | -\$331    | \$6,409  |
|                                                       | 20%                    | 95                     | \$77     | \$396   | 170                     | \$283    | \$1,415 | 270                     | \$876     | \$4,525  |
|                                                       | 40%                    | 72                     | \$134    | \$227   | 135                     | \$504    | \$844   | 227                     | \$1,702   | \$2,838  |
|                                                       | 60%                    | 39                     | \$112    | \$85    | 95                      | \$550    | \$396   | 169                     | \$1,982   | \$1,412  |
|                                                       | 80%                    | 10                     | \$39     | \$11    | 40                      | \$310    | \$85    | 95                      | \$1,496   | \$396    |
|                                                       | 100%                   | 0                      | \$0      | \$0     | 0                       | \$0      | \$0     | 0                       | \$0       | \$0      |
| <b>Responsibility sharing</b>                         | 0%                     | 126                    | \$0      | \$628   | 211                     | \$0      | \$2,105 | 319                     | \$0       | \$6,374  |
|                                                       | 20%                    | 125                    | -\$1     | \$627   | 210                     | -\$3     | \$2,105 | 318                     | -\$14     | \$6,377  |
|                                                       | 40%                    | 125                    | -\$2     | \$626   | 210                     | -\$8     | \$2,104 | 317                     | -\$41     | \$6,378  |
|                                                       | 60%                    | 123                    | -\$4     | \$620   | 208                     | -\$18    | \$2,102 | 315                     | -\$87     | \$6,393  |
|                                                       | 80%                    | 120                    | -\$10    | \$611   | 208                     | -\$33    | \$2,109 | 313                     | -\$160    | \$6,427  |
|                                                       | 100%*                  | 117                    | -\$24    | \$608   | 202                     | -\$77    | \$2,095 | 304                     | -\$331    | \$6,409  |
| <b>District reference level as % of BAU emissions</b> | 0%                     | 0                      | \$0      | \$0     | 0                       | \$0      | \$0     | 0                       | \$0       | \$0      |
|                                                       | 20%                    | 0                      | \$0      | \$0     | 0                       | \$0      | \$0     | 0                       | \$0       | \$0      |
|                                                       | 40%                    | 0                      | \$0      | \$0     | 0                       | \$0      | \$0     | 23                      | \$362     | \$95     |
|                                                       | 60%                    | 0                      | \$0      | \$0     | 28                      | \$221    | \$60    | 197                     | \$2,653   | \$1,285  |
|                                                       | 80%                    | 28                     | \$93     | \$48    | 150                     | \$743    | \$760   | 271                     | \$1,925   | \$3,493  |
|                                                       | 100%*                  | 117                    | -\$24    | \$608   | 202                     | -\$77    | \$2,095 | 304                     | -\$331    | \$6,409  |
|                                                       | 120%                   | 125                    | -\$810   | \$1,436 | 209                     | -\$1,626 | \$3,717 | 313                     | -\$3,348  | \$9,612  |

274 (A) Abatement (MtCO<sub>2</sub>e/yr)

275 (N) National government net revenue (million \$/yr)

276 (D) District revenue from REDD+ less penalties and transaction costs (million \$/yr)

277 \*default policy setting

278 **Table SI9 – Sensitivity of impacts to variation in key parameters.** Results are outputs of OSIRIS-  
 279 Indonesia v1.5 using the following default parameter assumptions: carbon price=\$10/tCO<sub>2</sub>e; “effective”  
 280 price elasticity of demand for frontier agriculture=3.8; exogenous agricultural price increase=0%; peat  
 281 emission factor=1474 tCO<sub>2</sub>e/ha; social preference for agricultural revenue=1.0; start-up and transaction  
 282 costs=\$0.

|                                                                        |                          | Basic Voluntary Incentive Structure |           |          | Improved Voluntary Incentive Structure |          |         | Mandatory Incentive Structure |         |         | Effectiveness of improved incentives <sup>1</sup> |
|------------------------------------------------------------------------|--------------------------|-------------------------------------|-----------|----------|----------------------------------------|----------|---------|-------------------------------|---------|---------|---------------------------------------------------|
|                                                                        |                          | A                                   | N         | D        | A                                      | N        | D       | A                             | N       | D       |                                                   |
| <b>Model Parameters</b>                                                |                          |                                     |           |          |                                        |          |         |                               |         |         |                                                   |
| <b>Carbon price (tCO<sub>2</sub>e/yr)</b>                              | \$5                      | 32                                  | -\$3,003  | \$3,162  | 99                                     | \$95     | \$401   | 126                           | \$404   | \$223   | 71%                                               |
|                                                                        | \$10*                    | 62                                  | -\$5,970  | \$6,590  | 175                                    | \$331    | \$1,424 | 211                           | \$808   | \$1,297 | 76%                                               |
|                                                                        | \$15                     | 89                                  | -\$8,857  | \$10,196 | 234                                    | \$659    | \$2,853 | 272                           | \$1,213 | \$2,865 | 79%                                               |
|                                                                        | \$20                     | 114                                 | -\$11,656 | \$13,929 | 278                                    | \$1,030  | \$4,536 | 319                           | \$1,617 | \$4,757 | 80%                                               |
| <b>Estimated effect of revenue on deforestation<sup>2</sup></b>        | Low                      | 45                                  | -\$5,976  | \$6,429  | 138                                    | \$276    | \$1,103 | 163                           | \$808   | \$818   | 79%                                               |
|                                                                        | Point estimate*          | 62                                  | -\$5,970  | \$6,590  | 175                                    | \$331    | \$1,424 | 211                           | \$808   | \$1,297 | 76%                                               |
|                                                                        | Random draw              | 62                                  | -\$5,970  | \$6,587  | 175                                    | \$329    | \$1,418 | 210                           | \$808   | \$1,287 | 76%                                               |
|                                                                        | High                     | 76                                  | -\$5,973  | \$6,729  | 214                                    | \$427    | \$1,709 | 247                           | \$808   | \$1,665 | 81%                                               |
| <b>National reference level as % of BAU emissions</b>                  | 80%                      | 62                                  | -\$7,587  | \$6,590  | 175                                    | -\$1,286 | \$1,424 | 211                           | -\$808  | \$1,297 | 76%                                               |
|                                                                        | 100%                     | 62                                  | -\$5,970  | \$6,590  | 175                                    | \$331    | \$1,424 | 211                           | \$808   | \$1,297 | 76%                                               |
|                                                                        | 120%                     | 62                                  | -\$4,353  | \$6,590  | 175                                    | \$1,948  | \$1,424 | 211                           | \$2,425 | \$1,297 | 76%                                               |
| <b>Effective elasticity</b>                                            | 0                        | 71                                  | -\$5,894  | \$6,606  | 206                                    | \$413    | \$1,652 | 242                           | \$808   | \$1,610 | 79%                                               |
|                                                                        | 1.9                      | 66                                  | -\$5,935  | \$6,598  | 192                                    | \$379    | \$1,540 | 227                           | \$808   | \$1,461 | 78%                                               |
|                                                                        | 3.8*                     | 62                                  | -\$5,970  | \$6,590  | 175                                    | \$331    | \$1,424 | 211                           | \$808   | \$1,297 | 76%                                               |
|                                                                        | 5.7                      | 58                                  | -\$6,002  | \$6,582  | 161                                    | \$281    | \$1,329 | 195                           | \$808   | \$1,145 | 75%                                               |
| <b>Exogenous agricultural price increase</b>                           | 0%*                      | 62                                  | -\$5,970  | \$6,590  | 175                                    | \$331    | \$1,424 | 211                           | \$808   | \$1,297 | 76%                                               |
|                                                                        | 20%                      | 54                                  | -\$6,039  | \$6,575  | 170                                    | \$312    | \$1,386 | 206                           | \$808   | \$1,251 | 76%                                               |
|                                                                        | 50%                      | 41                                  | -\$6,143  | \$6,555  | 158                                    | \$270    | \$1,310 | 199                           | \$808   | \$1,179 | 74%                                               |
| <b>Biomass carbon data set</b>                                         | Ruesch and Gibbs (2008)* | 62                                  | -\$5,970  | \$6,590  | 175                                    | \$331    | \$1,424 | 211                           | \$808   | \$1,297 | 76%                                               |
|                                                                        | WHRC (2011)              | 41                                  | -\$4,332  | \$4,746  | 127                                    | \$244    | \$1,023 | 151                           | \$642   | \$868   | 78%                                               |
| <b>Peat emission factor (tCO<sub>2</sub>e/ha)<sup>3</sup></b>          | 947.5                    | 40                                  | -\$5,004  | \$5,401  | 120                                    | \$224    | \$979   | 147                           | \$686   | \$852   | 75%                                               |
|                                                                        | 1474.2*                  | 62                                  | -\$5,970  | \$6,590  | 175                                    | \$331    | \$1,424 | 211                           | \$808   | \$1,297 | 76%                                               |
|                                                                        | 2099.8                   | 95                                  | -\$7,098  | \$8,044  | 256                                    | \$490    | \$2,069 | 298                           | \$954   | \$2,033 | 79%                                               |
| <b>District-level start-up and transaction costs (\$/district/5yr)</b> | \$0*                     |                                     |           |          | 175                                    | \$331    | \$1,424 | 211                           | \$808   | \$1,297 | 83%                                               |
|                                                                        | \$1 million              |                                     |           |          | 174                                    | \$329    | \$1,378 | 211                           | \$808   | \$1,231 | 82%                                               |
|                                                                        | \$5 million              |                                     |           |          | 171                                    | \$325    | \$1,212 | 211                           | \$808   | \$971   | 81%                                               |
|                                                                        | \$10 million             |                                     |           |          | 170                                    | \$322    | \$1,017 | 211                           | \$808   | \$645   | 81%                                               |
| <b>Per-hectare start-up and transaction costs (\$/ha/5yr)</b>          | \$0*                     | 62                                  | -\$5,970  | \$6,590  | 175                                    | \$331    | \$1,424 | 211                           | \$808   | \$1,297 | 76%                                               |
|                                                                        | \$1,000                  | 59                                  | -\$5,974  | \$6,559  | 169                                    | \$323    | \$1,339 | 202                           | \$808   | \$1,182 | 77%                                               |
|                                                                        | \$5,000                  | 46                                  | -\$5,985  | \$6,438  | 127                                    | \$247    | \$930   | 173                           | \$808   | \$801   | 64%                                               |
|                                                                        | \$10,000                 | 32                                  | -\$5,994  | \$6,306  | 82                                     | \$161    | \$491   | 143                           | \$808   | \$426   | 45%                                               |
| <b>Social preference for agricultural revenue</b>                      | 1.0*                     | 62                                  | -\$5,970  | \$6,590  | 175                                    | \$331    | \$1,424 | 211                           | \$808   | \$1,297 | 76%                                               |
|                                                                        | 2.0                      | 58                                  | -\$5,989  | \$6,571  | 167                                    | \$316    | \$1,352 | 211                           | \$808   | \$1,297 | 71%                                               |
|                                                                        | 3.0                      | 56                                  | -\$5,999  | \$6,554  | 162                                    | \$310    | \$1,313 | 211                           | \$808   | \$1,297 | 68%                                               |

283 (A) Abatement (MtCO<sub>2</sub>e/yr)

284 (N) National government net revenue (million \$/yr)

285 (D) District revenue from REDD+ less penalties and transaction costs (million \$/yr)

286 \*default parameter value

287 <sup>1</sup>Effectiveness of improved incentives is calculated as the difference in abatement between the basic and improved  
 288 voluntary incentives structures divided by the difference in abatement between the basic voluntary incentive  
 289 structure and the mandatory incentive structure

290 <sup>2</sup>Low/random draw/high=lower end of/random draw from/higher end of 95% confidence interval around the  
 291 econometrically estimated effect of revenue on deforestation (see Econometric Methods)

292 <sup>3</sup>Range of peat emission factors based on “low,” “likely” and “high” estimates from Hoojier et al (2010).

293

294 **Table SI10: First-order relationship between potential agricultural revenue and alternative**  
 295 **indicators of short-term and long-term deforestation**

| <b>Potential agricultural revenue (\$/ha/yr) (Naidoo and Iwamura, 2007)</b> | <b>Number of observations</b> | <b>Average forest cover (%), 2000 (Hansen et al 2003)</b> | <b>Average forest cover (%), 2000 (Miettinen et al 2011)</b> | <b>Aggregate deforestation rate (%/yr), 2000-2005 (Hansen et al 2008, 2009)</b> | <b>Aggregate gross forest cover loss rate (%/yr), 2000-2010 (Miettinen et al 2011)</b> | <b>Average palm plantation coverage (%), 2010 (Miettinen et al 2012)</b> |
|-----------------------------------------------------------------------------|-------------------------------|-----------------------------------------------------------|--------------------------------------------------------------|---------------------------------------------------------------------------------|----------------------------------------------------------------------------------------|--------------------------------------------------------------------------|
| \$0                                                                         | 2,273                         | 68%                                                       | 75%                                                          | 0.2%                                                                            | 0.8%                                                                                   | 0.3%                                                                     |
| \$1-100                                                                     | 78,603                        | 68%                                                       | 70%                                                          | 0.4%                                                                            | 2.0%                                                                                   | 1.1%                                                                     |
| \$101-200                                                                   | 25,495                        | 55%                                                       | 51%                                                          | 0.5%                                                                            | 3.0%                                                                                   | 3.0%                                                                     |
| \$201-300                                                                   | 49,627                        | 48%                                                       | 44%                                                          | 1.3%                                                                            | 4.2%                                                                                   | 4.1%                                                                     |
| \$301-400                                                                   | 5,685                         | 42%                                                       | 34%                                                          | 1.3%                                                                            | 4.4%                                                                                   | 3.8%                                                                     |
| \$401-500                                                                   | 11,395                        | 30%                                                       | 24%                                                          | 2.0%                                                                            | 7.5%                                                                                   | 7.7%                                                                     |
| \$501-600                                                                   | 7,958                         | 33%                                                       | 25%                                                          | 1.6%                                                                            | 6.2%                                                                                   | 7.0%                                                                     |
| \$601-700                                                                   | 1,511                         | 31%                                                       | 23%                                                          | 2.0%                                                                            | 6.9%                                                                                   | 7.9%                                                                     |
| \$701-800                                                                   | 5,664                         | 26%                                                       | 17%                                                          | 2.5%                                                                            | 9.1%                                                                                   | 10.7%                                                                    |
| \$801-900                                                                   | 670                           | 19%                                                       | 14%                                                          | 1.0%                                                                            | 4.8%                                                                                   | 1.9%                                                                     |
| \$901-1000                                                                  | 1,149                         | 19%                                                       | 17%                                                          | 1.3%                                                                            | 5.3%                                                                                   | 4.5%                                                                     |
| \$1000+                                                                     | 5,436                         | 13%                                                       | 10%                                                          | 0.7%                                                                            | 4.8%                                                                                   | 0.4%                                                                     |

296

297

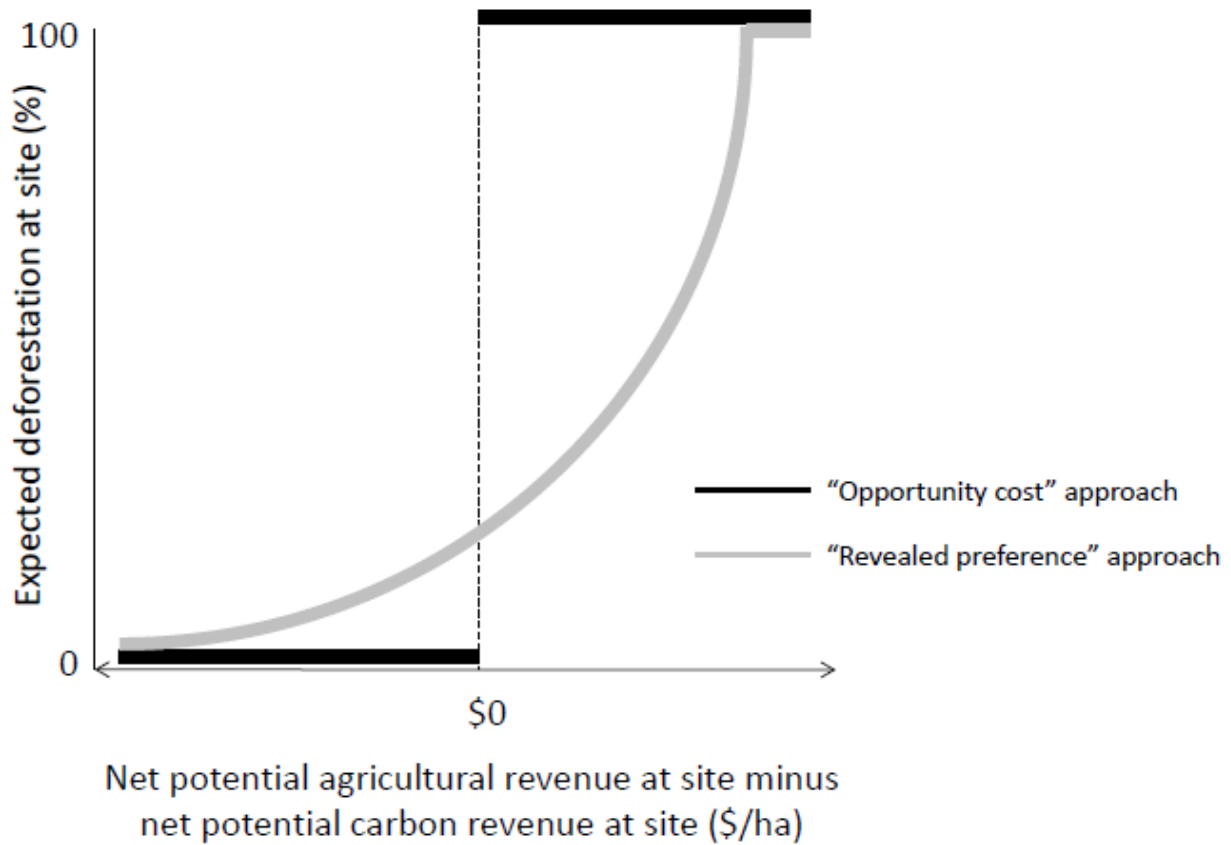

298  
 299 **Figure SI1 – Predicted site-level deforestation as a function of potential agricultural and carbon**  
 300 **revenue.** Many previous studies have estimated the abatement potential of REDD+ policies based on the  
 301 deterministic assumption that deforestation could be avoided entirely if and only if revenue from carbon  
 302 payments exceeds income from alternative land uses (“opportunity cost approach”). We estimate the  
 303 marginal impact of potential carbon payments on site-level deforestation by using a Poisson regression to  
 304 determine the empirical relationship between the pattern of observed historical deforestation and spatial  
 305 variation in the benefits and costs of converting forested land to agriculture (“revealed preference  
 306 approach”).

307



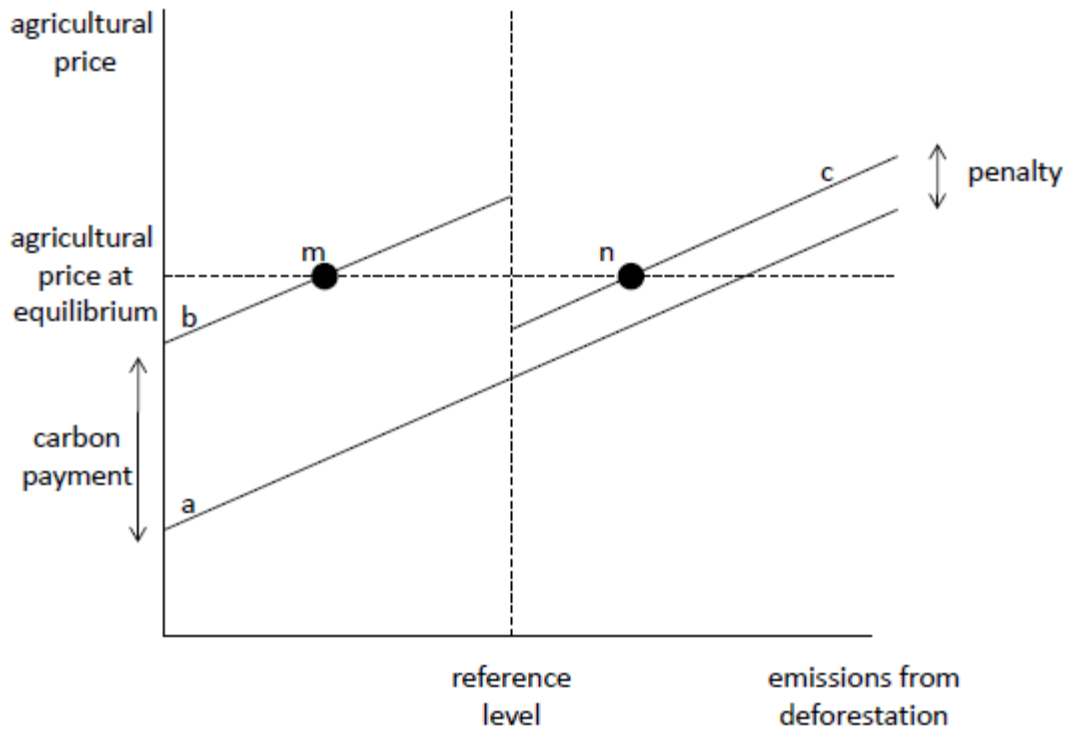

308

309 **Figure SI2 – District-level allocation of land between forest and agriculture.** Based on Figure 2 in  
 310 Busch et al 2009. Line *a* represents the district-level supply curve for emissions-producing agricultural  
 311 expansion into forest in the absence of a REDD+ mechanism. Greater potential agricultural revenue per  
 312 hectare produces greater emissions from deforestation. Line *b* represents the district supply curve if the  
 313 district opts into REDD+ by reducing its emissions below its reference level. This supply curve is shifted  
 314 inward by the carbon payment, which is a function of the carbon price and the revenue sharing  
 315 arrangement. Line *c* is the district supply curve if the district opts out of REDD+ by increasing its  
 316 emissions above its reference level. This supply curve is shifted inward by the penalty, which is a  
 317 function of the carbon price and the responsibility sharing arrangement. The district chooses the quantity  
 318 of emissions from agricultural expansion *m* or *n* which provides greater total carbon revenue and  
 319 agricultural revenue at the equilibrium agricultural price.

320

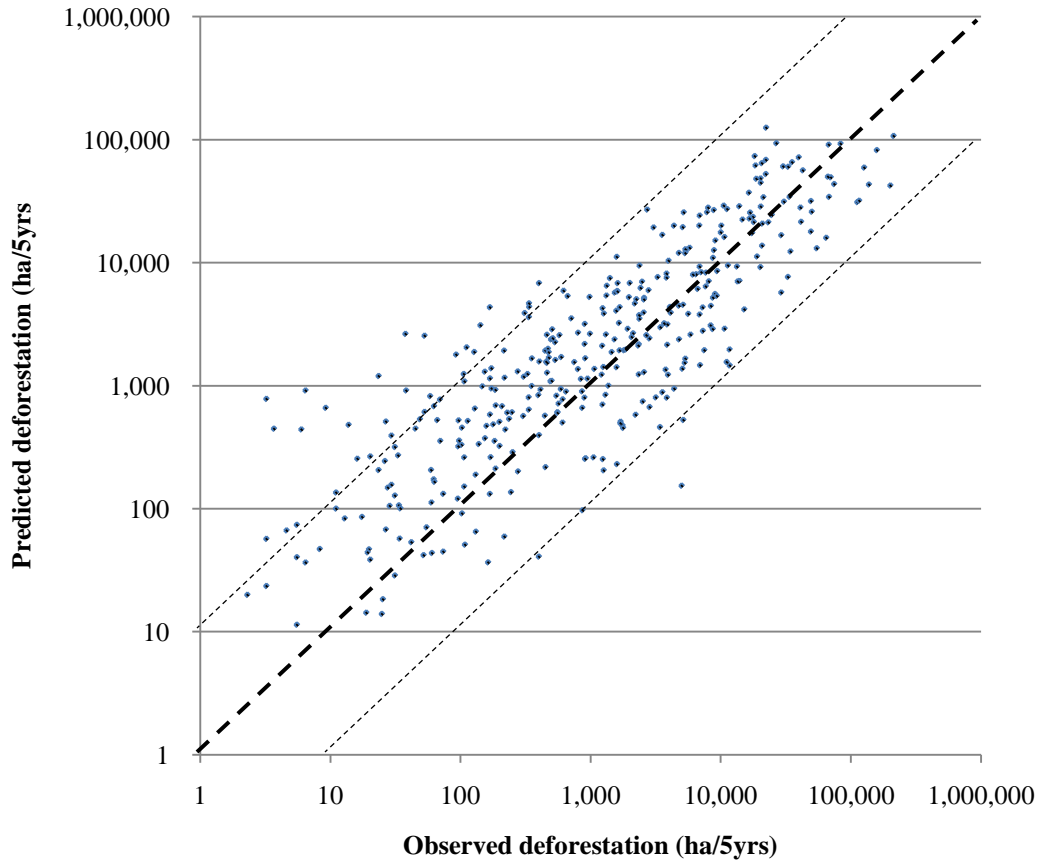

321

322 **Figure SI3 – Observed deforestation and predicted deforestation compared for forested districts of**  
 323 **Indonesia, 2000-2005. (n=401; R=0.68)** Predicted deforestation using model specification 1 (Poisson;  
 324 stratified by forest cover). Heavy dotted 45° line indicates predicted deforestation equal to observed  
 325 deforestation within a district. Light dotted lines indicate the boundaries within which predicted  
 326 deforestation is within a factor of ten of observed deforestation.

327

328 **Equations**

329

330 Eq. 1 – Predicted deforestation at sites in the absence of REDD+ based on observable site characteristics

$$y_i = \exp(\beta_{k0} + X_i' \beta_{k1} + \beta_{k2} A_i + \epsilon)$$

331 Here  $y_i = (F_i^o - F_i')/F_i^o$  is percent deforestation at site  $i$ , where  $F_i^o$  is forest cover at site  $i$  at the start of  
 332 the 2000-2005 observation period, and  $F_i'$  is forest cover at site  $i$  at the end of the observation period.  
 333  $k \in 1:4$  are classes of observations stratified by initial forest cover (Table SII).  $X_i$  is a matrix of  
 334 observable site characteristics, including slope, elevation, natural logarithm of the distance to the nearest  
 335 road, natural logarithm of the distance to the nearest provincial capital, and the percent of site within a  
 336 national park, other protected area, logging concession (HPH), timber concession (HTI), or estate crop  
 337 concession (*kebun*).  $A_i$  is the net present value of gross agricultural revenue potential per hectare at site  $i$ .  
 338 The term  $\beta_{k0}$  captures unobserved constant components of the expected net benefits of deforestation.

339

340 Eq. 2 – Expected deforestation at sites in the absence of REDD+

$$\hat{y}_{i-without REDD+} = \exp(\hat{\beta}_{k0} + X_i' \hat{\beta}_{k1} + \hat{\beta}_{k2} A_i)$$

341 Here  $\hat{y}_{i-without REDD+}$  is the expected deforestation at site  $i$  in the absence of REDD+. The distribution  
 342 across the country of all  $\hat{y}_{i-without REDD+}$  is the reference scenario.

343

344 Eq. 3 – Effective land rental value at a site

$$A_i + \frac{\hat{\beta}_{k0} + X_i' \hat{\beta}_{k1}}{\hat{\beta}_{k2}}$$

345 Effective land rental value at a site includes not only potential gross agricultural revenue but also costs.

346

347 Eq. 4 – Expected deforestation at a site in a district that opts in to REDD+

$$\hat{y}_{i-with REDD+; opt in} = \exp(\hat{\beta}_{k0} + X_i' \hat{\beta}_{k1} + \hat{\beta}_{k2} ((1 + \tau_1 + \tau_2) A_i - R_i))$$

348 Here  $\tau_1$  is the endogenous increase in price due to intranational leakage, and  $\tau_2$  is the exogenous increase  
 349 in price due to international leakage.  $R_i$  is the marginal carbon revenue per hectare of forest accruing to a  
 350 district that has opted in to REDD+.

351

352 Eq. 5 – Carbon revenue per hectare of forest accruing to a district which has opted in to REDD+

$$R_i = p_C * (1 - r) * E_i$$

353 Here  $p_C$  is the price paid by international buyers for carbon emission reductions,  $r \in [0,1]$  is the portion  
 354 of world carbon price withheld by the national government under a revenue sharing arrangement (e.g.  $r=0$   
 355 world signify that carbon price accrues entirely to the district), and  $E_i$  is the emission reductions resulting  
 356 from a decrease in deforestation at parcel  $i$  (tCO<sub>2</sub>e/ha).

357

358 Eq. 6 – Expected deforestation at a site in a district that opts in to REDD+

$$\hat{Y}_{i-with REDD+; opt out} = \exp(\hat{\beta}_{k0} + X_i' \hat{\beta}_{k1} + \hat{\beta}_{k2}((1 + \tau_1 + \tau_2)A_i - C_i))$$

359 Here  $C_i$  is the marginal cost per hectare of deforestation incurred by a district which has opted out of  
 360 REDD+.

361

362 Eq. 7 – Cost per hectare of deforestation incurred by a district which has opted out of REDD+

$$C_i = p_C * (1 - l) * E_i$$

363 Here  $l \in [0,1]$  is the share of cost for emission increases borne by the national government under a  
 364 responsibility-sharing arrangement (e.g.  $l=1$  would signify that cost is borne entirely by the national  
 365 government).

366

367 Eq. 8 – Districts' participation decision

$$p_C * (1 - r)[RL_j - \sum_{i \in j} (\hat{Y}_{i-with REDD+; opt in} * F_i^o * E_i)] >$$

$$369 \quad \gamma[\sum_{i \in j} (\hat{Y}_{i-with REDD+; opt out} - \hat{Y}_{i-with REDD+; opt in}) * F_i^o * (1 + \tau_1 + \tau_2) * A_i]$$

$$- p_C * (1 - l) * \sum_{i \in j} (\hat{Y}_{i-with REDD+; opt out} * F_i^o * E_i - RL_j)$$

370 Here  $RL_j$  is the reference level for district  $j$ , and  $F_i^o$  is the starting forest cover at site  $i$ . Parameter  $\gamma$   
 371 represents the district's preference for agricultural revenue relative to carbon revenue.

372

373 Eq. 9 – Expected aggregate deforestation within a district, without REDD+

$$D_{j,without REDD+} = \sum_{i \in j} (\hat{Y}_{i-without REDD+} * F_i^o)$$

374

375 Eq. 10 – Expected aggregate deforestation within a district, with REDD+

$$D_{j,with REDD+} = \sum_{i \in j} (\hat{Y}_{i-with REDD+} * F_i^o)$$

376

377 Eq. 11 – Expected aggregate emissions within a district, without REDD+

$$E_{j,without REDD+} = \sum_{i \in j} (\hat{Y}_{i-without REDD+} * F_i^o * E_i)$$

378

379 Eq. 12 – Expected aggregate emissions within a district, with REDD+

$$E_{j,with REDD+} = \sum_{i \in j} (\hat{Y}_{i-with REDD+} * F_i^o * E_i).$$

381

382

383 Eq. 13 – Expected carbon revenue accruing to district from opting in to REDD+

$$B_j = \max \{0, (RL_j - E_{j,with REDD+}) * p_c * (1 - r)\}.$$

385

386

387 Eq. 14 – Expected cost incurred by a district from opting out of REDD+

$$C_j = \max \{0, (E_{j,without REDD+} - RL_j) * p_c * (1 - l)\}$$

388

389

390 Eq. 15 – Expected aggregate deforestation nationwide, without REDD+

$$D_{without REDD+} = \sum_j D_{j,without REDD+}$$

391

392

393 Eq. 16 – Expected aggregate deforestation nationwide, with REDD+

394

$$D_{with REDD+} = \sum_j D_{j,with REDD+}$$

395

396

397 Eq. 17 – Endogenous increase in potential agricultural revenue due to decreased aggregate deforestation  
398 nationwide

$$\tau_1 = \left( \frac{D_{without REDD+}}{D_{with REDD+}} \right)^e$$

399 The “effective elasticity” parameter  $e$  is functionally equivalent to the price elasticity of demand for  
400 frontier agriculture, but is calibrated to also incorporate economy-wide feedbacks in the domestic labor  
401 and productive capital markets from the separate IRSA-5 general equilibrium model of the Indonesian  
402 economy.

403

404
